# Supplementary material
Source: MDPI journal article supplement (https://www.mdpi.com/2571-8789/8/2/50)
Supplement: s1 [file s1]

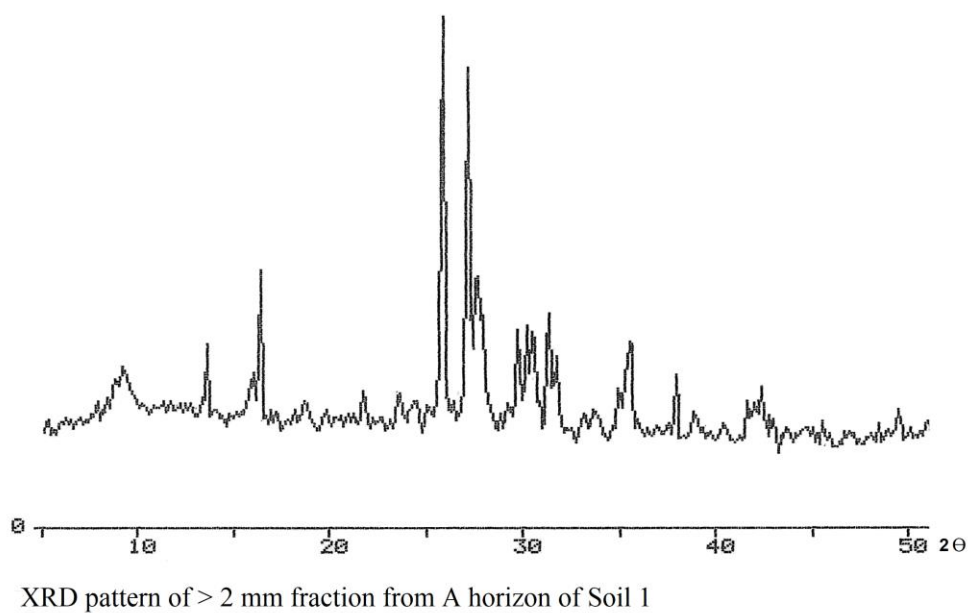

**Figure S1.** XRD pattern of > 2 mm fraction from A horizon of Soil 1.

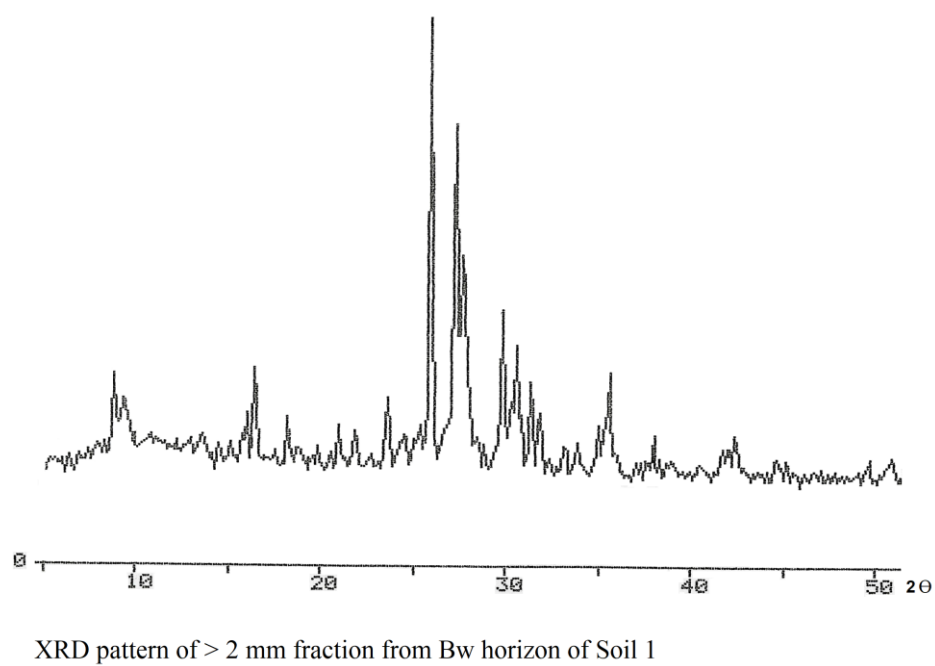

**Figure S2.** XRD pattern of > 2 mm fraction from Bw horizon of Soil 1.

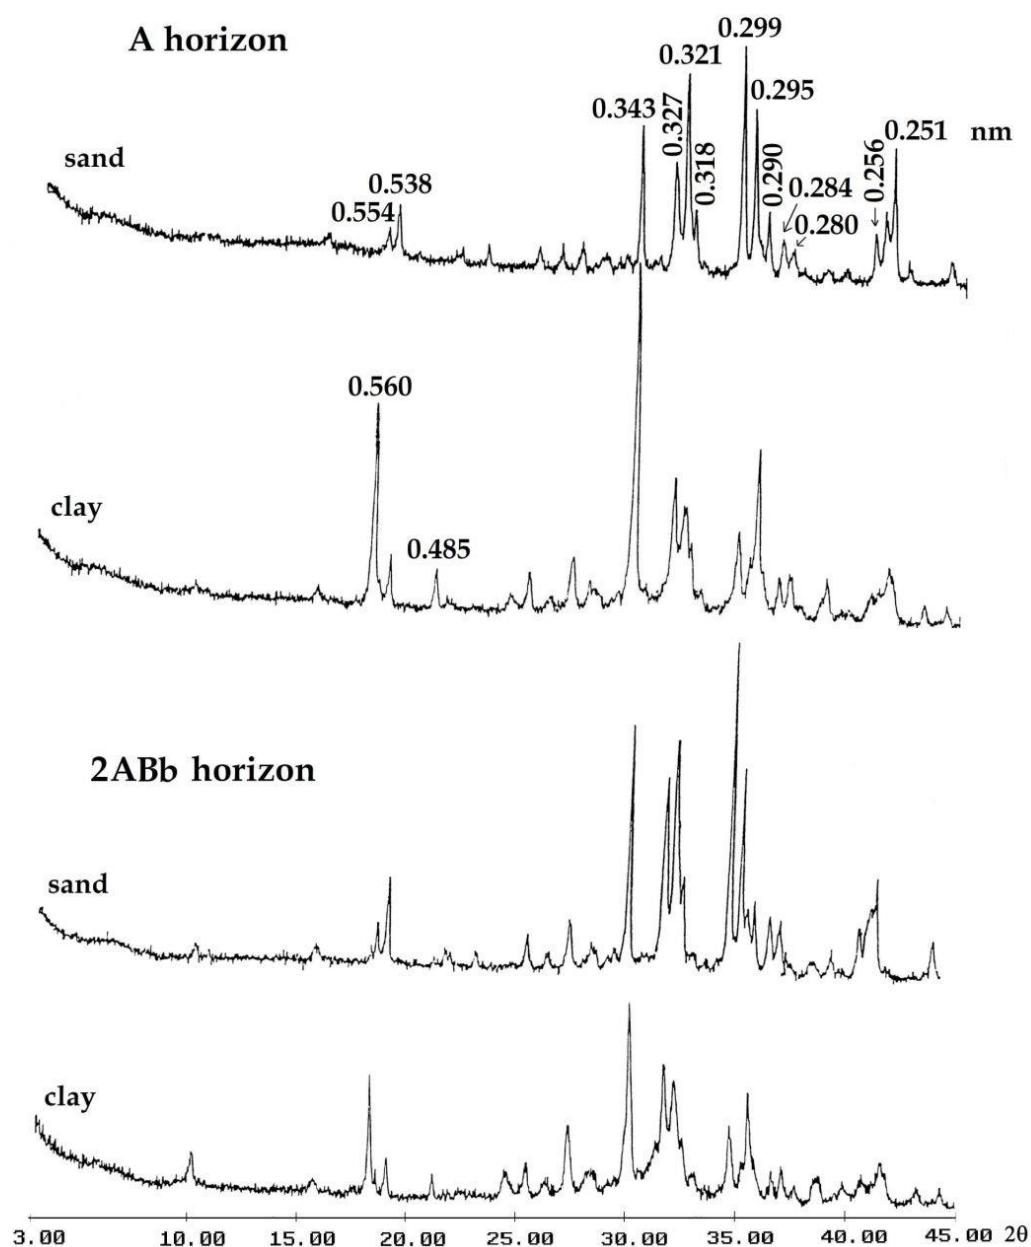

XRD patterns of sand and clay fractions from selected horizons of Soil 3

Figure S3. XRD pattern of sand and clay fractions from selected horizons of Soil 3.

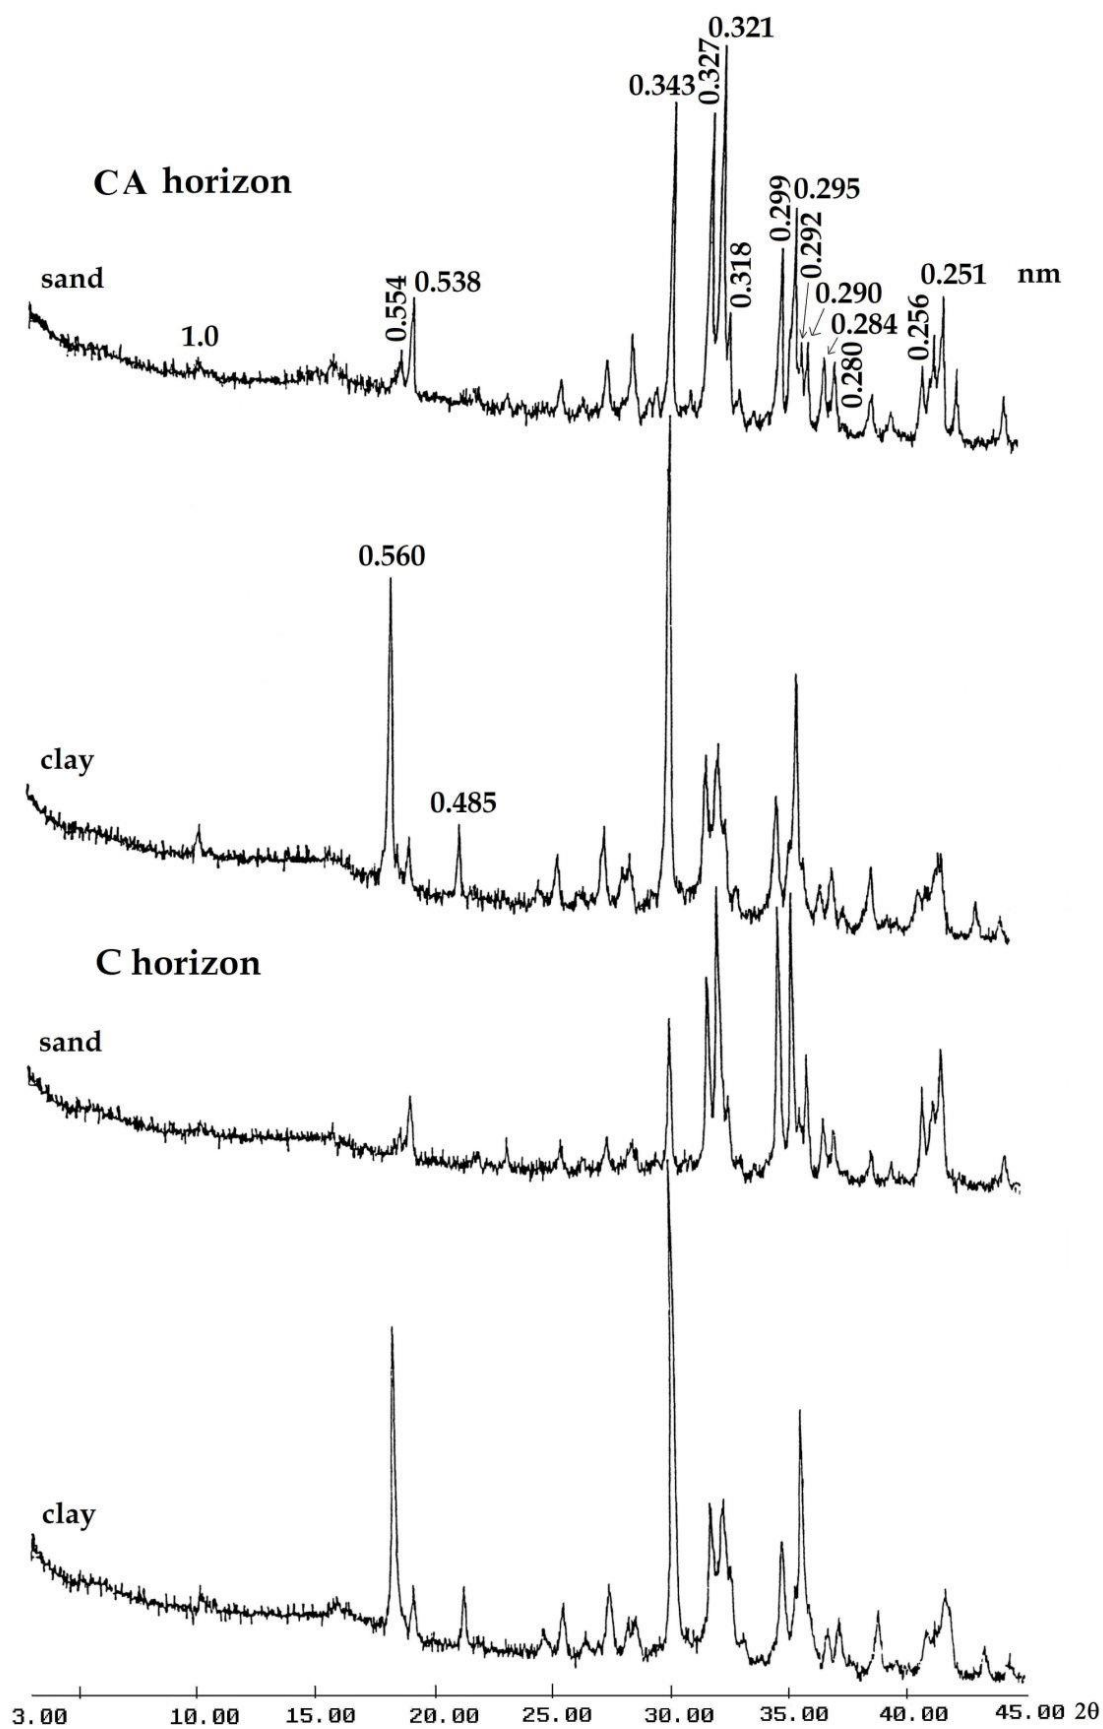

XRD patterns of sand and clay fractions from horizons of Soil 6

Figure S4. XRD pattern of sand and clay fractions from horizons of Soil 6.
